# Supplementary material for: Improving adeno-associated viral (AAV) vector-mediated transgene expression in retinal ganglion cells: comparison of five promoters
Source: PubMed Central journal article supplement (PMC10284706; doi:10.1038/s41434-022-00380-z), 2023-01-13

# Validation of ITR sites in plasmids

GeneRuler 1kb DNA ladder

AAV-CBA-eGFP (no Kozak)

AAV-CBA-eGFP

AAV-CMV-eGFP

AAV-PGK-eGFP

AAV-sCAG-eGFP

AAV-SYN-eGFP

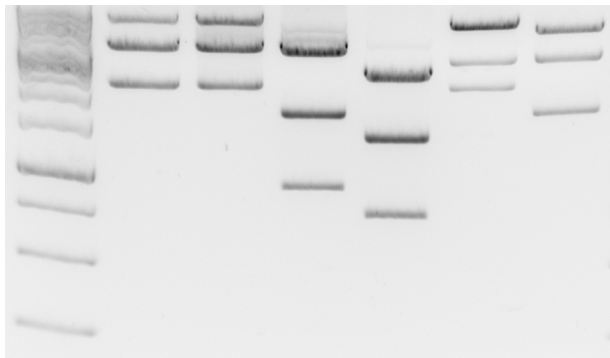

Supplement: 41434_2022_380_MOESM4_ESM.pdf [file 41434_2022_380_MOESM4_ESM.pdf]
