# Supplementary material for: Improving adeno-associated viral (AAV) vector-mediated transgene expression in retinal ganglion cells: comparison of five promoters
Source: PubMed Central journal article supplement (PMC10284706; doi:10.1038/s41434-022-00380-z), 2023-01-13

# Validation of plasmid expression in HEK293T cells

AAV-CBA-eGFP (no kozak)

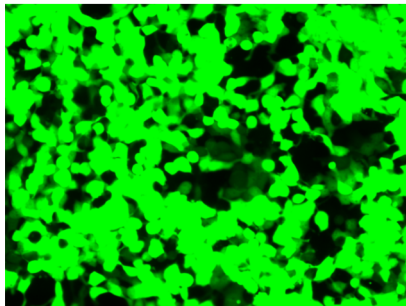

AAV-CBA-eGFP

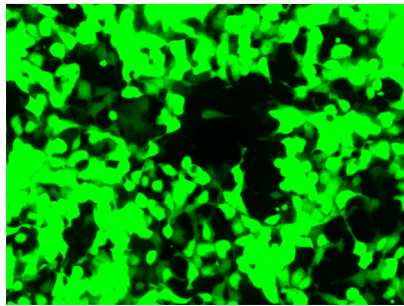

AAV-CMV-eGFP

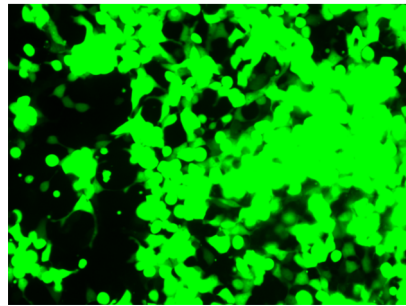

AAV-PGK-eGFP

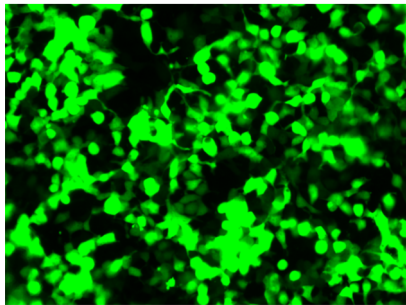

AAV-sCAG-eGFP

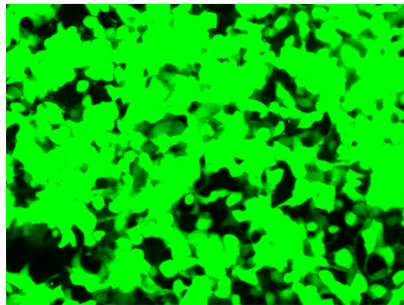

AAV-SYN-eGFP

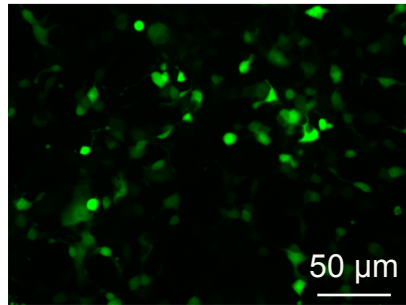

Supplement: 41434_2022_380_MOESM5_ESM.pdf [file 41434_2022_380_MOESM5_ESM.pdf]
