# Supplementary material for: Improving adeno-associated viral (AAV) vector-mediated transgene expression in retinal ganglion cells: comparison of five promoters
Source: PubMed Central journal article supplement (PMC10284706; doi:10.1038/s41434-022-00380-z), 2023-01-13
Supplement: 41434_2022_380_MOESM6_ESM.pdf [file 41434_2022_380_MOESM6_ESM.pdf]

# Intravitreal injection of AAV vectors for transgene delivery to the retina

Pre-injection

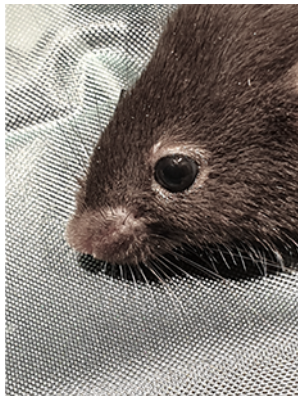

Needle into vitreous

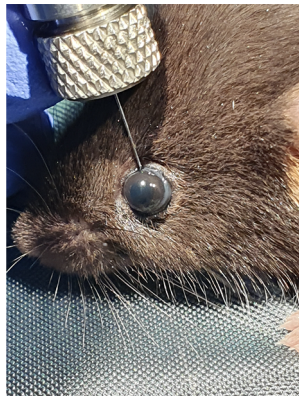

Vector administration

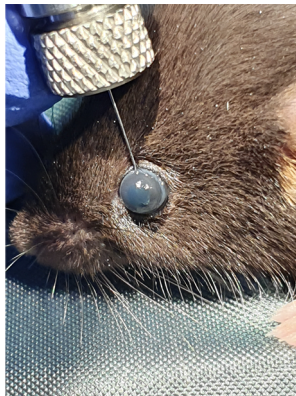

Post-injection

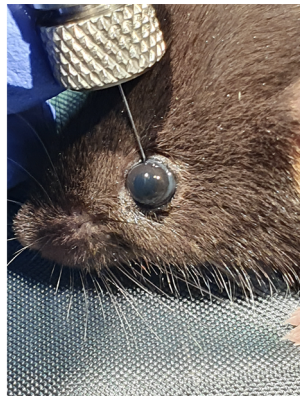

Anesthetised mouse
