# Supplementary material for: Improving adeno-associated viral (AAV) vector-mediated transgene expression in retinal ganglion cells: comparison of five promoters
Source: PubMed Central journal article supplement (PMC10284706; doi:10.1038/s41434-022-00380-z), 2023-01-13
Supplement: 41434_2022_380_MOESM7_ESM.pdf [file 41434_2022_380_MOESM7_ESM.pdf]

# Collection of neurological tissue for histology

Eye

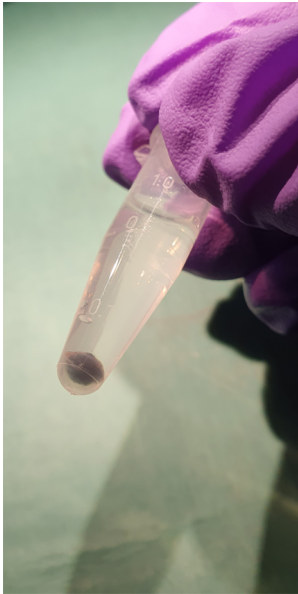

Brain - dorsal view

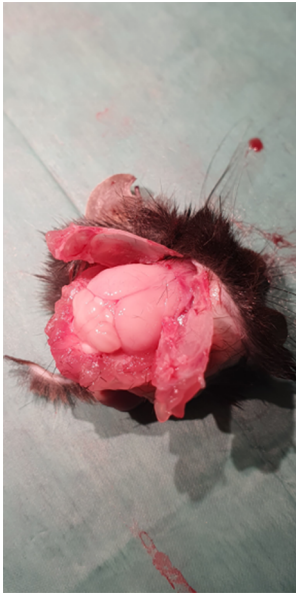

Brain - ventral view

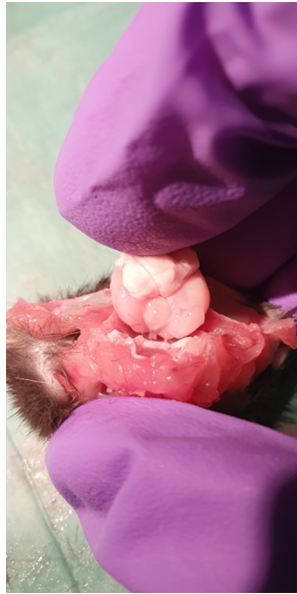

Optic chiasm

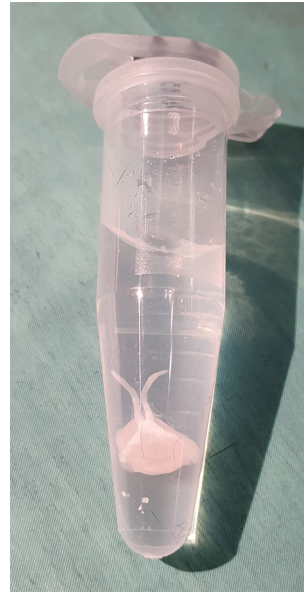

Post-mortem mouse tissue
