# Supplementary material for: Improving adeno-associated viral (AAV) vector-mediated transgene expression in retinal ganglion cells: comparison of five promoters
Source: PubMed Central journal article supplement (PMC10284706; doi:10.1038/s41434-022-00380-z), 2023-01-13

# RGC viability in post-mortem human retinal explants

## i. overtime

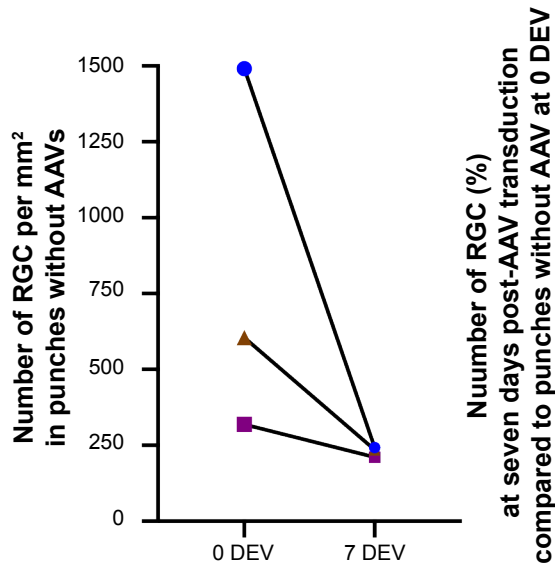

## ii. per viral vector per donor

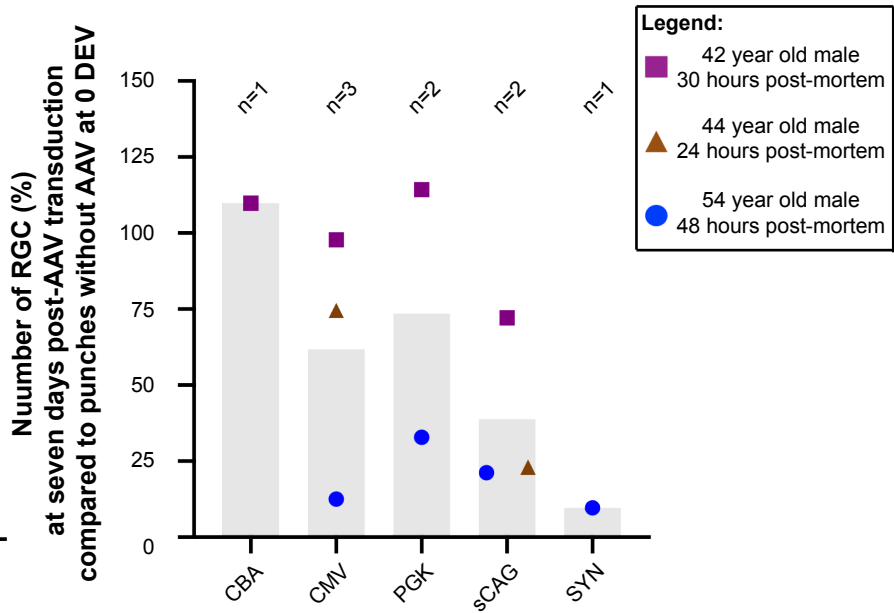

Supplement: 41434_2022_380_MOESM9_ESM.pdf [file 41434_2022_380_MOESM9_ESM.pdf]
